# Supplementary material for: A self-templating method for metal–organic frameworks to construct multi-shelled bimetallic phosphide hollow microspheres as highly efficient electrocatalysts for hydrogen evolution reaction
Source: Royal Society of Chemistry journal article supplement (doi:10.1039/c9ta00557a), 2019-01-01
Supplement: c9ta00557a1.pdf [file c9ta00557a1.pdf]

**Self-templating method of metal-organic frameworks to  
construct multi-shelled bimetallic phosphides hollow  
microsphere as highly efficient electrocatalysts for hydrogen  
evolution reaction**

Yunmei Du, Mingjuan Zhang, Zuochao Wang, Yanru Liu\*, Yongjun Liu, Yanling Geng and Lei

Wang\*

*Taishan scholar advantage and characteristic discipline team of Eco chemical process and  
technology, Key Laboratory of Eco-chemical Engineering, College of Chemistry and Molecular  
Engineering, Qingdao University of Science and Technology, Qingdao 266042, P. R. China*

---

\* Corresponding author. Email: [liuyanru@qust.edu.cn](mailto:liuyanru@qust.edu.cn) (Y.R. Liu), [inorchemwl@126.com](mailto:inorchemwl@126.com) (L. Wang)

**Fig. S1** XRD pattern of the NiP microspheres.

**Fig. S2** (a, b) SEM images of the NiP microspheres.

**Fig. S3** XRD pattern of CoP.

**Fig. S4.** (a, b) SEM images of CoP.

**Fig. S5** EDX image of the as-synthesized CoNiP-0.25 microspheres.

**Fig. S6** N<sub>2</sub> adsorption-desorption isotherm (inset: corresponding NLDFT pore diameter distribution) of (a) CoNiP-0.12; (b) CoNiP-0.17; (c) CoNiP-0.25; (d) CoNiP-0.47.

**Fig. S7** XPS patterns of CoNiP-0.25 hollow microspheres after HER reaction in alkaline electrolyte solution: (a) Co 2p post-HER; (b) Ni 2p post-HER; (c) P 2p post-HER.

**Fig. S8** (a) Nyquist plots of the as-synthesized CoNiP-0.25 microspheres in 1.0 M KOH. (b) Tafel slop of the as-synthesized CoNiP-0.25 microspheres fitted from EIS data.

**Fig. S9** (a) HER polarization curves of Pt/C, CoNiP-n (n=0.12, 0.17, 0.25, 0.47) microspheres obtained by two-step phosphatization, (b) Nyquist plots at a potential of -150 mV vs. RHE, (c) HER polarization curves of CoNiP-0.12 microspheres obtained by two-step phosphatization (solid line) and one-step phosphorization (dash dot line), (d) HER polarization curves of CoNiP-0.17 microspheres obtained by two-step phosphatization (solid line) and one-step phosphorization (dash dot line), (e) HER polarization curves of CoNiP-0.25 microspheres obtained by two-step phosphatization (solid line) and one-step phosphorization (dash dot line), (f) HER polarization curves

of CoNiP-0.47 microspheres obtained by two-step phosphatization (solid line) and one-step phosphorization (dash dot line). For all the measurements, iR-compensation was performed. The scan rate was  $5 \text{ mV s}^{-1}$  and electrolyte solution was 1.0 M KOH.

**Table S1** Summary of ICP results of CoNiP-n

**Table S2** Summary of various catalytic electrodes for HER.

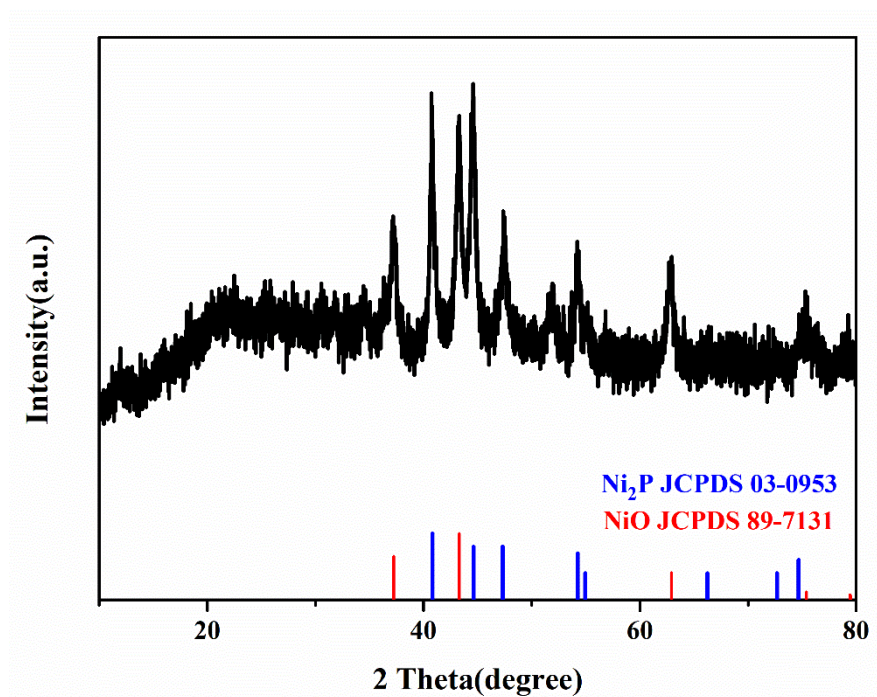

**Fig. S1** XRD pattern of the NiP microspheres.

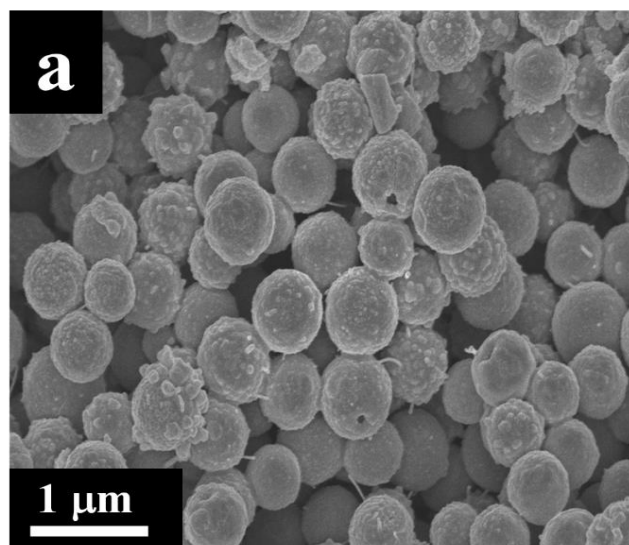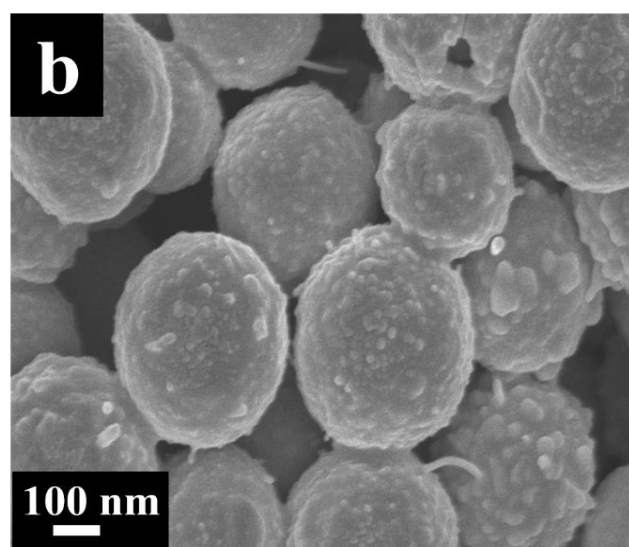

**Fig. S2** (a, b) SEM images of the NiP microspheres.

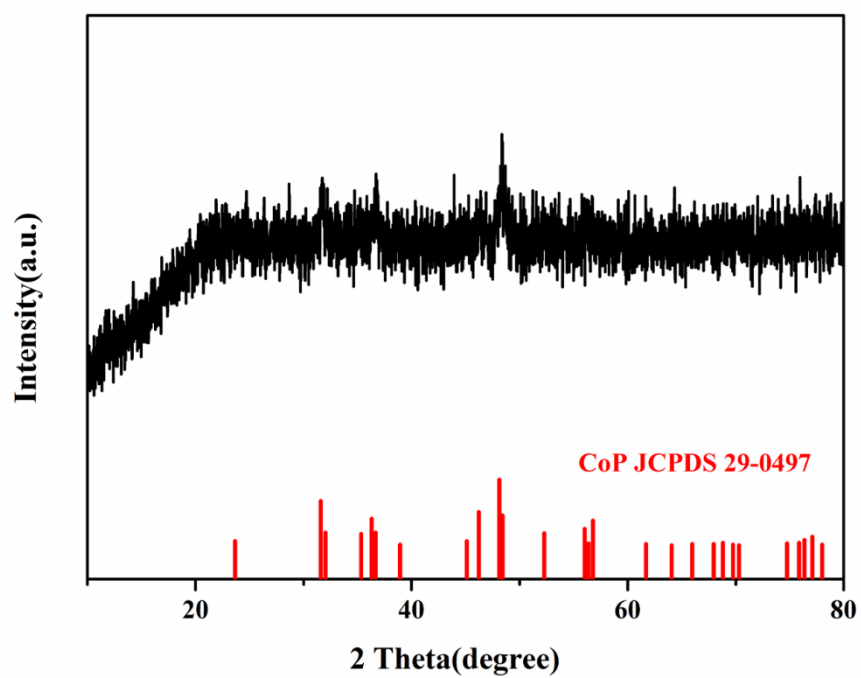

**Fig. S3** XRD pattern of CoP.

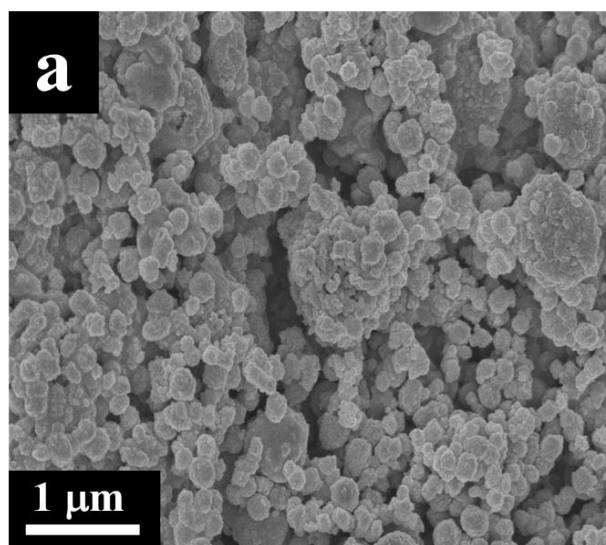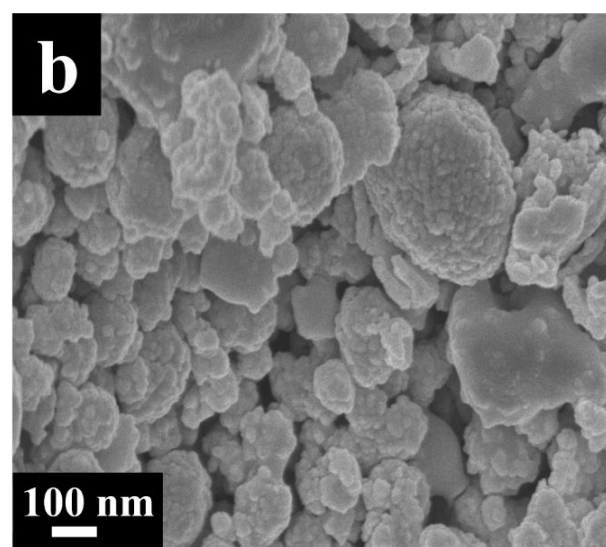

Fig. S4. (a, b) SEM images of CoP.

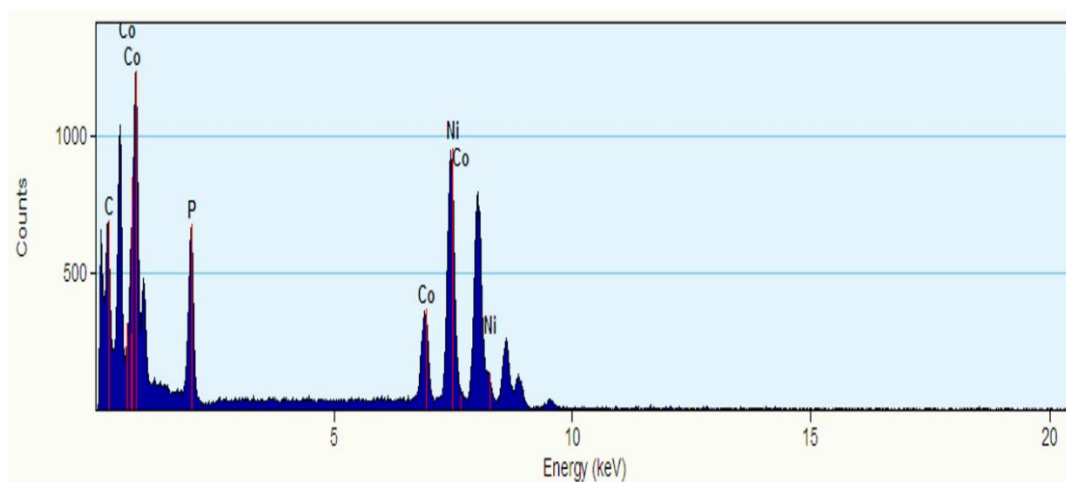

**Fig. S5** EDX image of the as-synthesized CoNiP-0.25 microspheres.



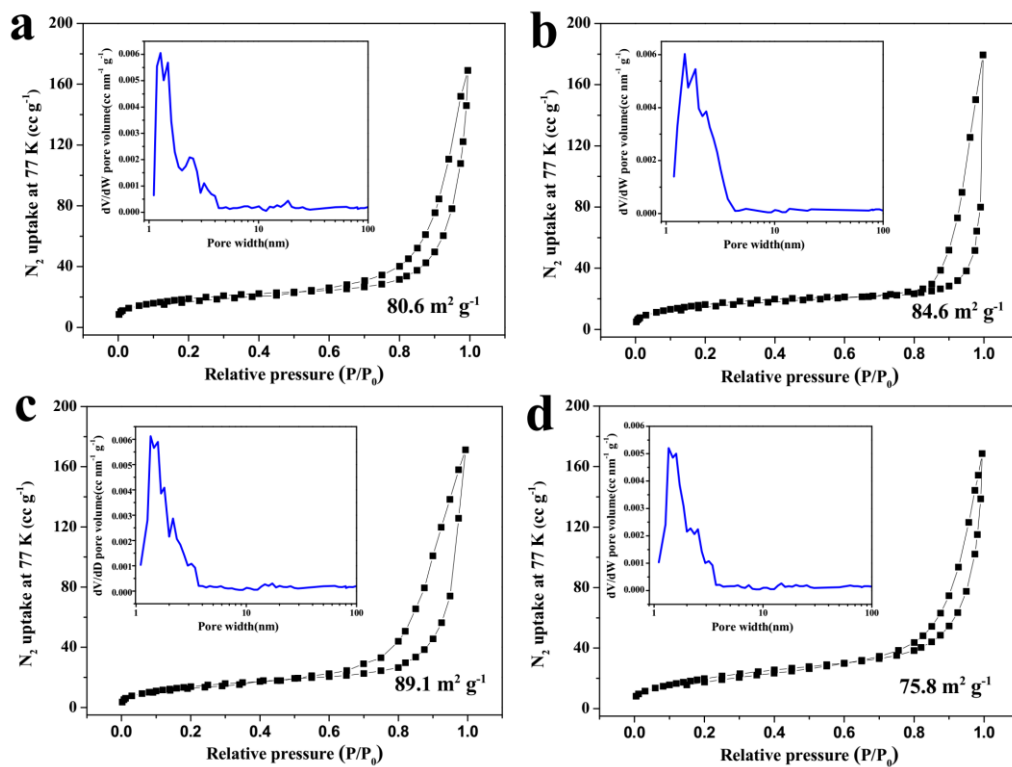

**Fig. S6**  $N_2$  adsorption-desorption isotherm (inset: corresponding NLDFT pore diameter distribution) of (a) CoNiP-0.12; (b) CoNiP-0.17; (c) CoNiP-0.25; (d) CoNiP-0.47.

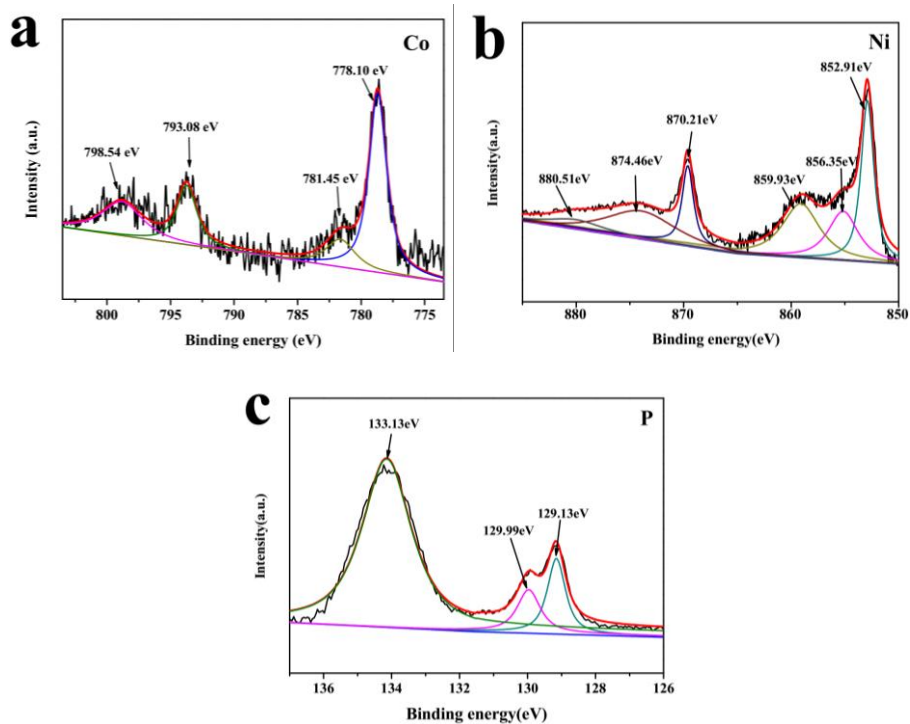

**Fig. S7** XPS patterns of CoNiP-0.25 hollow microspheres after HER reaction in alkaline electrolyte solution: (a) Co 2p post-HER; (b) Ni 2p post-HER; (c) P 2p post-HER.

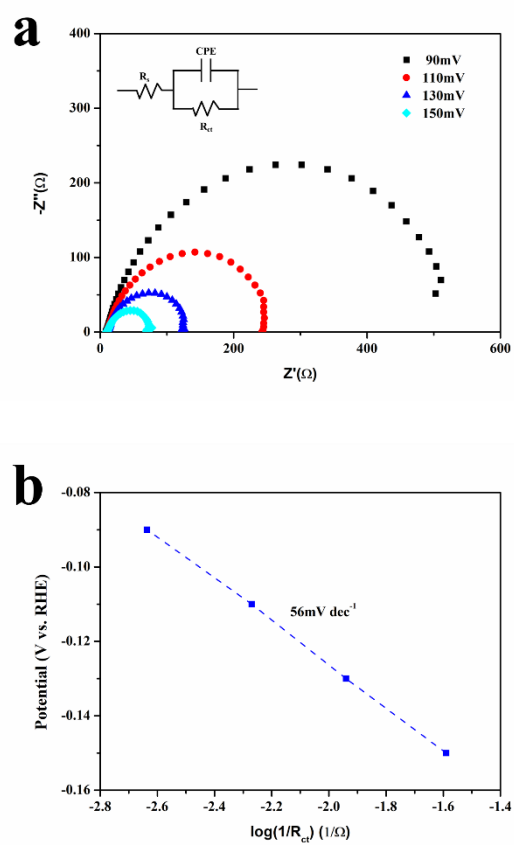

**Fig. S8** (a) Nyquist plots of the as-synthesized CoNiP-0.25 microspheres in 1.0 M KOH. (b) Tafel slop of the as-synthesized CoNiP-0.25 microspheres fitted from EIS data.

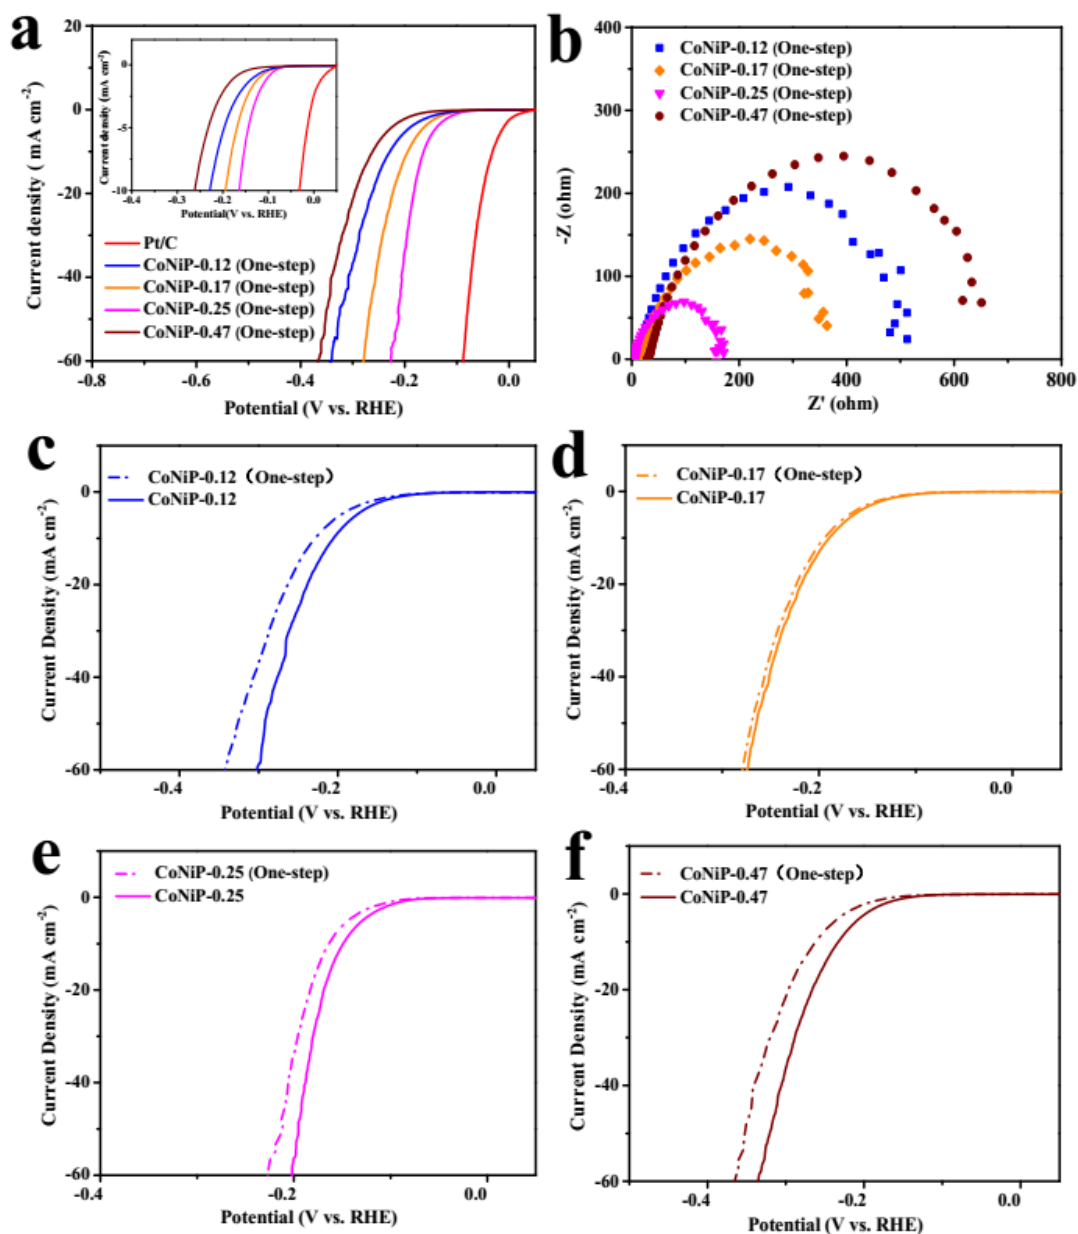

**Fig. S9** (a) HER polarization curves of Pt/C, CoNiP- $n$  ( $n=0.12, 0.17, 0.25, 0.47$ ) microspheres obtained by two-step phosphatization, (b) Nyquist plots at a potential of -150 mV vs. RHE, (c) HER polarization curves of CoNiP-0.12 microspheres obtained by two-step phosphatization (solid line) and one-step phosphorization (dash dot line), (d) HER polarization curves of CoNiP-0.17 microspheres obtained by two-step phosphatization (solid line) and one-step phosphorization (dash dot line), (e) HER polarization curves of CoNiP-0.25 microspheres obtained by two-step phosphatization

(solid line) and one-step phosphorization (dash dot line), (f) HER polarization curves of CoNiP-0.47 microspheres obtained by two-step phosphatization (solid line) and one-step phosphorization (dash dot line). For all the measurements, iR-compensation was performed. The scan rate was  $5 \text{ mV s}^{-1}$  and electrolyte solution was 1.0 M KOH.

**Table S1** Summery of ICP results of CoNiP-n

| <b>Phosphides</b>                              | CoNiP-0.12  | CoNiP-0.17  | CoNiP-0.25  | CoNiP-0.47  |
|------------------------------------------------|-------------|-------------|-------------|-------------|
| <b>ICP Co/Ni/P<br/>ratio in<br/>phosphides</b> | 1:8.12:3.25 | 1:5.81:2.41 | 1:3.98:1.64 | 1:2.13:0.98 |
| <b>Co/Ni ratio in<br/>reactants</b>            | 1:8         | 1:6         | 1:4         | 1:2         |

**Table S2** Summary of various catalytic electrodes for HER.

| <b>Catalysts</b>                     | <b>Voltages<br/><math>j_{10}(\text{mV})</math></b> | <b>Tafel slop<br/>(<math>\text{mV dec}^{-1}</math>)</b> | <b>Reference</b> |
|--------------------------------------|----------------------------------------------------|---------------------------------------------------------|------------------|
| CoNiP microspheres                   | 145.8                                              | 52                                                      | This work        |
| CoP@NPMG                             | 151                                                | 75                                                      | 1                |
| NiCo <sub>2</sub> O <sub>4</sub> /NF | 164                                                | 88                                                      | 2                |
| Co phosphide<br>/phosphate           | 380                                                | 53                                                      | 3                |
| Ni <sub>5</sub> P <sub>4</sub>       | 150                                                | 53                                                      | 4                |
| Co-P/NC                              | 154                                                | 51                                                      | 5                |

## Supplementary References

- 1 Y. Liu, Y. Zhu, J. H. Shen, J. F. Huang, X. L. Yang and C. Z. Li, *Nanoscale*, 2018, **10**, 2603-2612.
- 2 C. L. Xiao, Y. B. Li, X. Y. Lu and C. Zhao, *Adv. Funct. Mater.*, 2016, **26**, 3515-3523.
- 3 Y. Yang, H. L. Fei, G. D. Ruan and J. M. Tour, *Adv. Mater.*, 2015, **27**, 3175-3180.
- 4 M. Ledendecker and S. K. Calderón, C. Papp, H. P. Steinrück, M. Antonietti and M. Shalom, *Angew. Chem. Int. Ed.*, 2015, **54**, 12361-12365.
- 5 B. You, N. Jiang, M. L. Sheng, S. Gul, J. Yano and Y. J. Sun, *Chem. Mater.*, 2015, **27**, 7636-7642.
